# Supplementary material for: Mental illness in patients with end-stage kidney disease in South Korea: a nationwide cohort study
Source: PubMed Central journal article supplement — Kidney Res Clin Pract. 2021 Dec 6;41(2):231–41. doi: 10.23876/j.krcp.21.047 (PMC8995483; doi:10.23876/j.krcp.21.047), 2021-12-06
Supplement: j-krcp-21-047suppl1.pdf [file j-krcp-21-047suppl1.pdf]

**Supplementary Table 1.** Results of McNemar test of changes before and after initiation of KRT in psychiatric disorders by KRT for each psychiatric disorder

| Psychiatric disorder                | Group   | Before        |             | After         |               | p-value |
|-------------------------------------|---------|---------------|-------------|---------------|---------------|---------|
|                                     |         | No            | Yes         | No            | Yes           |         |
| Depression                          | Overall | 67,898 (96.9) | 2,181 (3.1) | 59,336 (84.7) | 10,743 (15.3) | <0.001  |
|                                     | HD      | 59,637 (97.0) | 1,860 (3.0) | 51,633 (84.0) | 9,864 (16.0)  | <0.001  |
|                                     | KT      | 3,750 (96.1)  | 151 (3.9)   | 3,712 (95.2)  | 189 (4.8)     | 0.02    |
|                                     | PD      | 4,511 (96.4)  | 170 (3.6)   | 3,991 (85.3)  | 690 (14.7)    | <0.001  |
| Anxiety                             | Overall | 67,015 (95.6) | 3,064 (4.4) | 57,683 (82.3) | 12,396 (17.7) | <0.001  |
|                                     | HD      | 58,913 (95.8) | 2,584 (4.2) | 50,105 (81.5) | 11,392 (18.5) | <0.001  |
|                                     | KT      | 3,643 (93.4)  | 258 (6.6)   | 3,578 (91.7)  | 323 (18.3)    | 0.003   |
|                                     | PD      | 4,459 (95.3)  | 222 (4.7)   | 4,000 (85.5)  | 681 (14.5)    | <0.001  |
| Somatoform/conversion disorder      | Overall | 69,951 (99.8) | 125 (0.2)   | 69,561 (99.3) | 518 (0.7)     | <0.001  |
|                                     | HD      | 61,399 (99.8) | 98 (0.2)    | 61,029 (99.2) | 468 (0.8)     | <0.001  |
|                                     | KT      | 3,880 (99.5)  | 21 (0.5)    | 3,877 (99.4)  | 24 (0.6)      | 0.64    |
|                                     | PD      | 4,675 (99.9)  | 6 (0.1)     | 4,655 (99.4)  | 26 (0.6)      | 0.0002  |
| Stress reaction/adjustment disorder | Overall | 69,602 (99.3) | 477 (0.7)   | 68,704 (98.0) | 1,375 (2.0)   | <0.001  |
|                                     | HD      | 61,073 (99.3) | 424 (0.7)   | 60,221 (97.9) | 1,276 (2.1)   | <0.001  |
|                                     | KT      | 3,877 (99.4)  | 24 (0.6)    | 3,857 (98.9)  | 44 (1.1)      | 0.01    |
|                                     | PD      | 4,652 (99.4)  | 29 (0.6)    | 4,626 (98.8)  | 55 (1.2)      | 0.003   |
| Substance abuse disorder            | Overall | 69,946 (99.8) | 133 (0.2)   | 69,782 (99.6) | 297 (0.4)     | <0.001  |
|                                     | HD      | 61,378 (99.8) | 119 (0.2)   | 61,220 (99.5) | 277 (0.5)     | <0.001  |
|                                     | KT      | 3,895 (99.8)  | 6 (0.2)     | 3,896 (99.9)  | 5 (0.1)       | 0.76    |
|                                     | PD      | 4,673 (99.8)  | 8 (0.2)     | 4,666 (99.7)  | 15 (0.3)      | 0.14    |

HD, hemodialysis; KT, kidney transplant; PD, peritoneal dialysis; KRT, kidney replacement therapy.
