# Supplementary material for: Mental illness in patients with end-stage kidney disease in South Korea: a nationwide cohort study
Source: PubMed Central journal article supplement — Kidney Res Clin Pract. 2021 Dec 6;41(2):231–41. doi: 10.23876/j.krcp.21.047 (PMC8995483; doi:10.23876/j.krcp.21.047), 2021-12-06
Supplement: j-krcp-21-047suppl2.pdf [file j-krcp-21-047suppl2.pdf]

**Supplementary Table 2 . Timing of most frequent visits for mental illness**

| Psychiatric disorder                | Group |       |       |
|-------------------------------------|-------|-------|-------|
|                                     | HD    | KT    | PD    |
| Depression                          |       |       |       |
| All visits                          | 464   | -42.9 | 353   |
| First visit                         | 37    | -47.9 | 8.23  |
| Anxiety                             |       |       |       |
| All visits                          | 604   | -28   | 335   |
| First visit                         | 32.5  | -29.8 | -32.1 |
| Somatoform/conversion disorder      |       |       |       |
| All visits                          | 973   | -17.1 | 393   |
| First visit                         | 77.3  | -58.2 | 121   |
| Stress reaction/adjustment disorder |       |       |       |
| All visits                          | 563   | -39.8 | 18.5  |
| First visit                         | 1.56  | -7.04 | -58.2 |
| Substance abuse disorder            |       |       |       |
| All visits                          | 147   | 2180  | 290   |
| First visit                         | -33.6 | -52.4 | 22.9  |

HD, hemodialysis; KT, kidney transplant; PD, peritoneal dialysis.
